# Supplementary material
Source: publisher site journal article supplement (https://www.dovepress.com/get_supplementary_file.php?f=447658.docx)
Supplement: Supplementary file 1 [file get_supplementary_file.php]

**Supplementary table 1: Pharmacological treatment between groups**

|  | DR-DME  n=183 | DR +DME  n=61 | p value |
| --- | --- | --- | --- |
| Metformin (%) | 140(76.50) | 49(80.33) | 0.53 |
| iSGLT (%) | 9(4.92) | 7(11.48) | 0.07 |
| Sulfonylureas (%) | 55(30.05) | 22 (36.07) | 0.42 |
| GLP1a (%) | 3(1.64) | 1(0.55) | 0.75 |
| i-DPP4 (%) | 20(10.93) | 18(29.53) | 0.001 |
| Insulin (%) | 19(10.38) | 8(13.11) | 0.55 |
| ACEI (%) | 16(8.74) | 2(3.28) | 0.25 |
| Calcium channel blockers (%) | 10(5.46) | 4(6.56) | 0.75 |
| ß blockers (%) | 12(6.56) | 4(6.56) | 1.00 |
| ARA2 (%) | 25(13.66) | 8(13.11) | 0.91 |
| Diuretics (%) | 10(5.46) | 3(4.92) | 0.86 |
| Statins (%) | 23(12.57) | 4(6.56) | 0.24 |
| Fibrates (%) | 16(8.64) | 2 (3.28) | 0.25 |
| Aspirin (%) | 18(9.84) | 5(8.20) | 0.80 |
| Allopurinol (%) | 2(1.09) | 1(0.55) | 1.00 |

Diabetic Retinopathy (DR) and without macular edema (DME): DR-DME:

Diabetic Retinopathy (DR) and Diabetic Macular Edema (DME): DR +DME

Inhibitors of Sodium-glucose cotransporter 2 inhibitor: iSGLT

Glucagon-like peptide 1 agonists: GLP1a

Inhibitors of dipeptidyl peptidase 4: i-DPP4

ACEI: Angiotensin-converting-enzyme inhibitors

Angiotensin 2: ARA2
